# Supplementary material for: Fungal Hyphae on the Assimilation Branches Are Beneficial for Haloxylon ammodendron to Absorb Atmospheric Water Vapor: Adapting to an Extreme Drought Environment
Source: MDPI journal article supplement (doi:10.3390/plants13091233), 2024-04-29
Supplement: s1 [file s1]

Table S1 Statistical table of atmospheric relative humidity above 50% during the growing season from May to September 2019 in Ejina Banner

| RH<br>(%)             | Total time<br>(min) | Minutes/Day<br>(min/d) | Hours/Day<br>(h/d) | Percent<br>(%) |
|-----------------------|---------------------|------------------------|--------------------|----------------|
| $50 \leq RH < 60$     | 10070.00            | 65.82                  | 1.10               | 36.66          |
| $60 \leq RH < 70$     | 6900.00             | 45.10                  | 0.75               | 25.12          |
| $70 \leq RH < 80$     | 4370.00             | 28.56                  | 0.48               | 15.91          |
| $80 \leq RH < 90$     | 5180.00             | 33.86                  | 0.56               | 18.86          |
| $90 \leq RH \leq 100$ | 950.00              | 6.21                   | 0.10               | 3.46           |
| sum                   | 27470.00            | 179.54                 | 2.99               | 100.00         |
